# Supplementary material for: Organic bulk-heterojunction injected perovskite films for highly efficient solar cells
Source: Royal Society of Chemistry journal article supplement (doi:10.1039/c9tc01058k), 2019-01-01
Supplement: c9tc01058k1.pdf [file c9tc01058k1.pdf]

## Supporting Information

### Organic Bulk-Heterojunction Injected Perovskite Films for Highly Efficient Solar Cells

*Ke-Hao Hu, Zhao-Kui Wang\**, Meng Li, Kai-Li Wang, Yue Zhang, and Liang-Sheng Liao\*

Institute of Functional Nano & Soft Materials (FUNSOM), Jiangsu Key Laboratory for Carbon-Based Functional Materials & Devices, Soochow University, Suzhou, Jiangsu 215123, China

\*Address correspondence to [zkwang@suda.edu.cn](mailto:zkwang@suda.edu.cn) (Z. K. Wang); [lsiao@suda.edu.cn](mailto:lsiao@suda.edu.cn) (L. S. Liao)

KEYWORDS: Perovskite solar cells; Crystallization; Passivation; Bulk-Heterojunction.

### Table of Contents

**Figure S1.** X-ray diffraction (XRD) pattern of  $\text{CH}_3\text{NH}_3\text{PbI}_3$  and  $\text{CH}_3\text{NH}_3\text{PbI}_3$ : BHJ films.

**Figure S2.** EDAX spectra of  $\text{CH}_3\text{NH}_3\text{PbI}_3$  and  $\text{CH}_3\text{NH}_3\text{PbI}_3$ : BHJ films.

**Figure S3.** X-ray photoelectron spectroscopy (XPS) measurements. The survey spectra of  $\text{CH}_3\text{NH}_3\text{PbI}_3$  and  $\text{CH}_3\text{NH}_3\text{PbI}_3$ : BHJ films.

**Figure S4.**  $J$ - $V$  characteristics of organic solar cell device using PTB7: ITIC (1:1) as active layer and  $\text{CH}_3\text{NH}_3\text{PbI}_3$ : BHJ-based champion device.

**Figure S5.**  $J$ - $V$  characteristics of representative  $\text{CH}_3\text{NH}_3\text{PbI}_3$ - and  $\text{CH}_3\text{NH}_3\text{PbI}_3$ : BHJ-based devices under different scan directions

**Table S1.** The performance of perovskite solar cells based on different concentration of PTB7: ITIC in chlorobenzene.

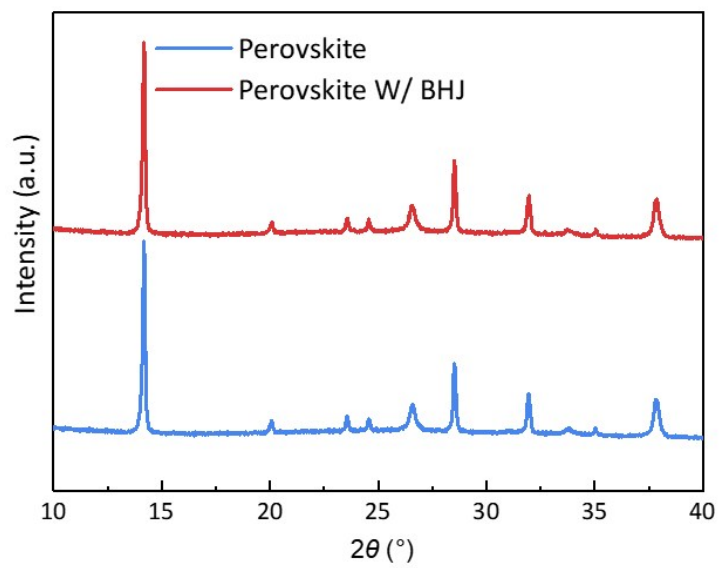

**Figure S1.** X-ray diffraction (XRD) pattern of  $\text{CH}_3\text{NH}_3\text{PbI}_3$  and  $\text{CH}_3\text{NH}_3\text{PbI}_3$ : BHJ films.

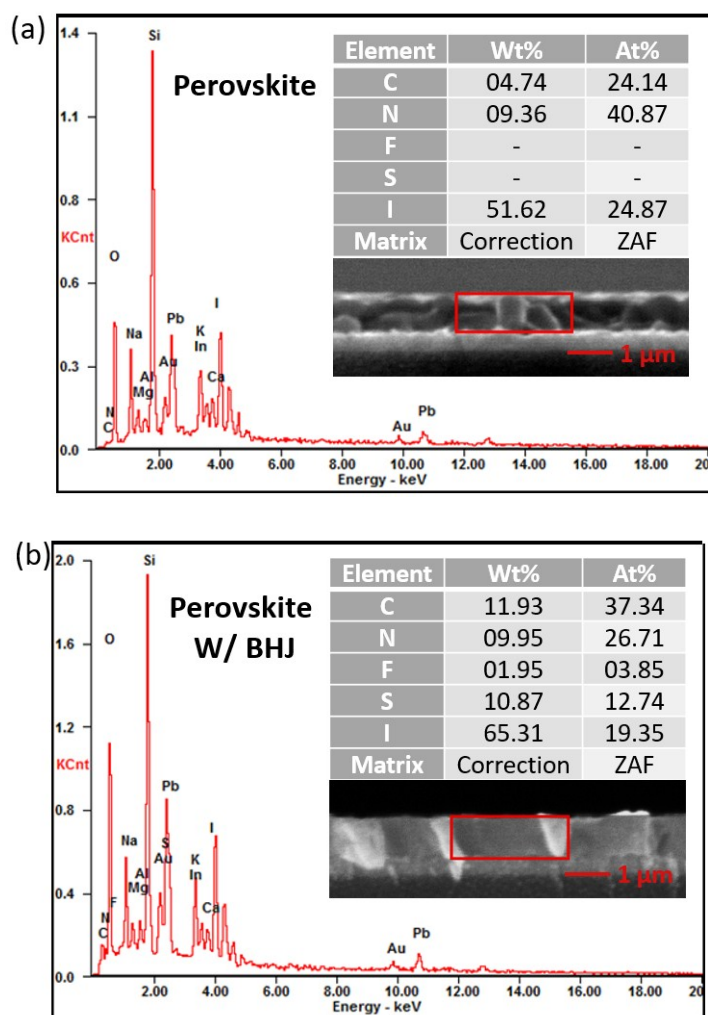

**Figure S2.** EDAX spectra of a)  $\text{CH}_3\text{NH}_3\text{PbI}_3$  and b)  $\text{CH}_3\text{NH}_3\text{PbI}_3$ : BHJ films.

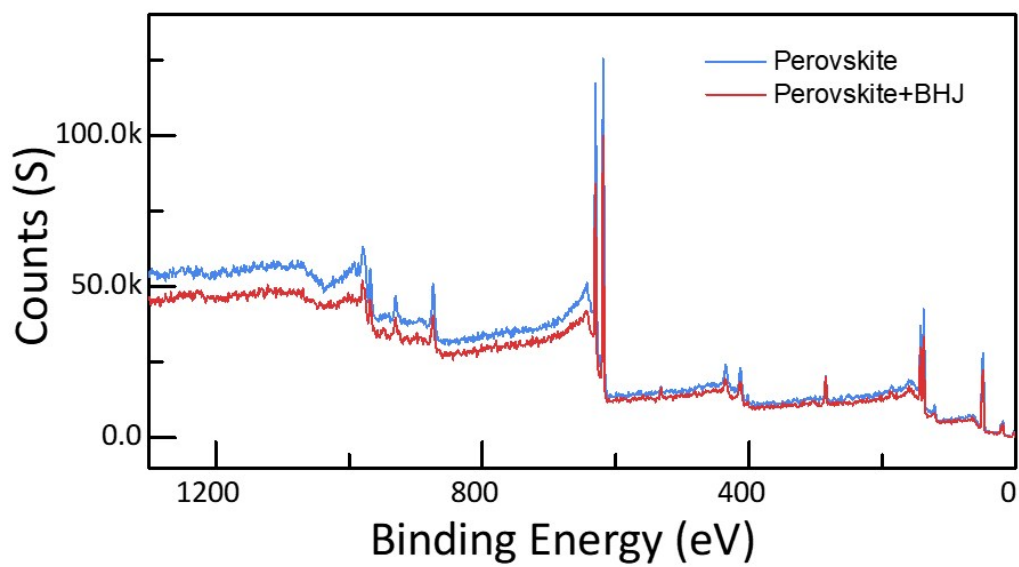

**Figure S3.** X-ray photoelectron spectroscopy (XPS) measurements. The survey spectra of  $\text{CH}_3\text{NH}_3\text{PbI}_3$  and  $\text{CH}_3\text{NH}_3\text{PbI}_3$ : BHJ films.

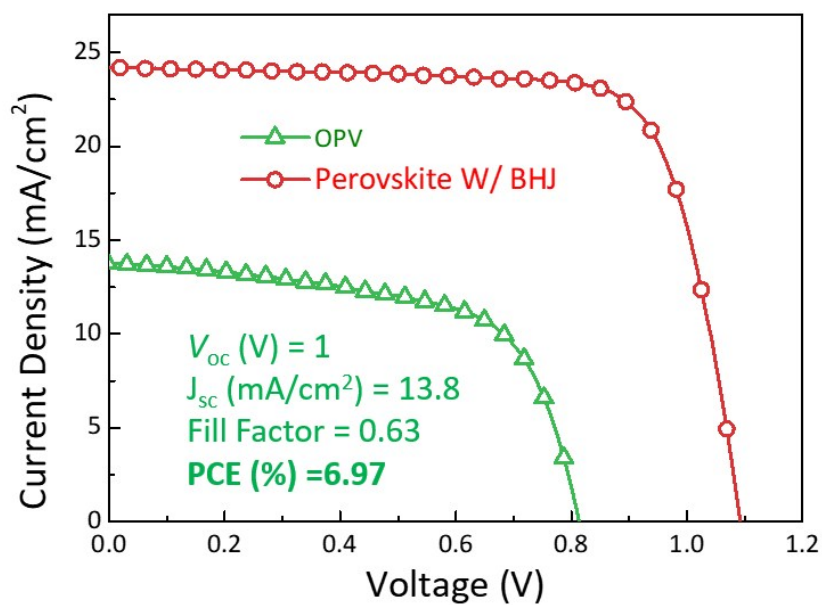

**Figure S4.**  $J$ - $V$  characteristics of organic solar cell device using PTB7: ITIC (1:1) as active layer and CH<sub>3</sub>NH<sub>3</sub>PbI<sub>3</sub>: BHJ-based champion device.

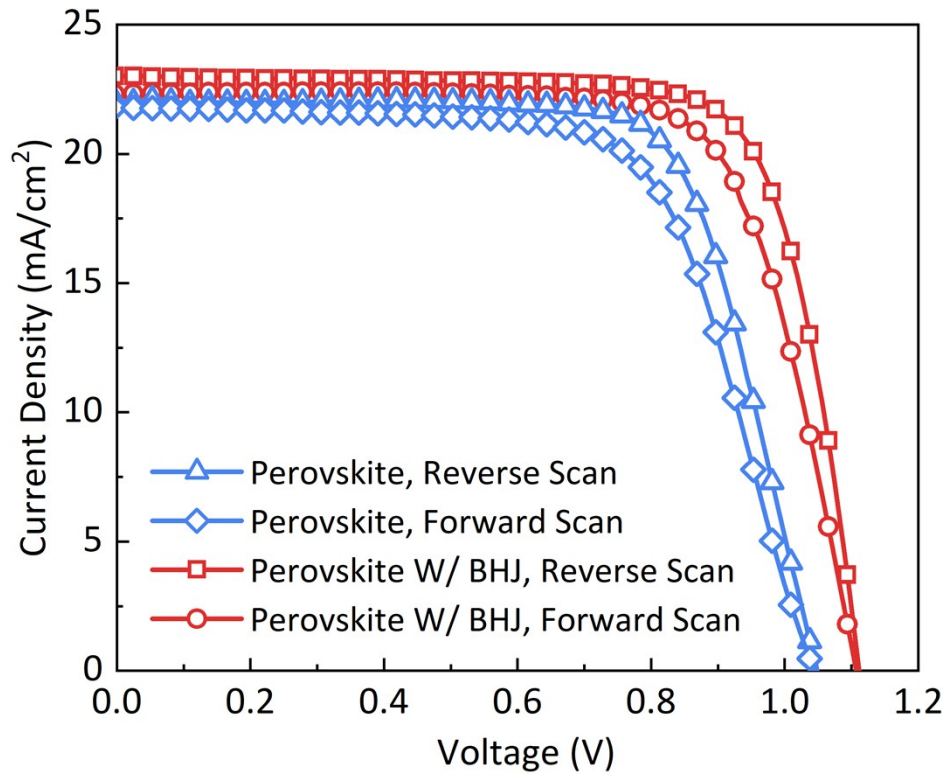

| Device               | Scan Direction | $V_{oc}$ (V) | $J_{sc}$ (mA/cm <sup>2</sup> ) | FF(%) | PCE (%) |
|----------------------|----------------|--------------|--------------------------------|-------|---------|
| Reference            | Reverse        | 1.06         | 22.0                           | 71    | 16.69   |
|                      | Forward        | 1.05         | 21.8                           | 67    | 15.28   |
| Perovskite W/<br>BHJ | Reverse        | 1.11         | 23.2                           | 76    | 19.54   |
|                      | Forward        | 1.11         | 22.3                           | 73    | 18.17   |

**Figure S5.**  $J$ - $V$  characteristics of representative  $\text{CH}_3\text{NH}_3\text{PbI}_3$ - and  $\text{CH}_3\text{NH}_3\text{PbI}_3$ : BHJ-based devices under different scan directions

**Table S1.** The performance of perovskite solar cells based on different concentration of PTB7: ITIC in chlorobenzene.

| <b>Device</b> | <b><math>V_{oc}</math> (V)</b> | <b><math>J_{sc}</math> (mA/cm<sup>2</sup>)</b> | <b>FF</b> | <b>PCE (%)</b> |
|---------------|--------------------------------|------------------------------------------------|-----------|----------------|
| 0.12 mg/ml    | 1.11                           | 23.0                                           | 74        | 18.99          |
| 0.24 mg/ml    | 1.10                           | 24.2                                           | 76        | 20.00          |
| 0.48 mg/ml    | 1.00                           | 22.6                                           | 74        | 18.49          |
